# Supplementary material for: Medical Information on the Internet: A Tool for Measuring Consumer Perception of Quality Aspects
Source: PubMed Central journal article supplement (PMC4395769; doi:10.2196/ijmr.3144), 2015-03-30
Supplement: ijmr_v4i1e8_app1.pdf [file ijmr_v4i1e8_app1.pdf]

Appendix 1. The seven dimensions with the original items of the measure based on the observational study (compare Table 1 in the article) and the original items of the outcome measure (compare Textbox 1 in the article). The scale was tested in German language. All items were answered on a seven-point scale ranging from 1 “completely disagree” to 7 “completely agree” and shown in randomized order.

### **Trustworthiness**

- 01** Die Autoren der Internetseite verfolgen offensichtlich eigennützige Ziele.
- 02** Die Autoren geben die verwendeten Quellen an.
- 03** Die Informationen werden neutral dargestellt.
- 04** Nicht alle Informationen scheinen medizinisch begründet zu sein.
- 05** Die Auskünfte der Internetseite waren mir bereits bekannt.
- 06** Man hat den Eindruck überredet zu werden.
- 07** Die dargestellten Inhalte haben mich überzeugt.
- 08** Die Internetseite wirkt auf mich vertrauenswürdig.

### **Competence**

- 09** Die Internetseite informiert gut zum Thema.
- 10** Man kann annehmen der Autor kennt sich aus, da er einen akademischen Titel trägt (Professor, Doktor, Diplom).
- 11** Die Informationen der Internetseite sind aktuell (entsprechen den neusten medizinischen Kenntnissen).
- 12** Meiner Meinung nach handelt es sich um eine unabhängige Internetseite.
- 13** Ich fand es gut, dass die Internetseite über mehrere Gesundheitsthemen informiert.
- 14** Ich habe das Gefühl, der Autor weiß nicht wirklich wovon er spricht.
- 15** Online-Medien sind grundsätzlich nicht für Gesundheitsfragen geeignet.

### **Interference**

- 16** Die Werbung hat mich gestört.
- 17** Die Internetseite enthält seriöse Links.
- 18** Werbe Pop-Ups helfen im Allgemeinen die Informationen auf der Internetseite sinnvoll zu ergänzen.
- 19** Die Internetseite enthält unwichtige Links.

**20** Im Allgemeinen helfen bewegte Werbeanzeigen die Aufmerksamkeit auf das Thema zu lenken.

**21** Die Internetseite enthält viele unnütze Informationen.

**22** Man ist durch nichts auf dieser Internetseite vom Inhalt abgelenkt.

### **Layout**

**23** Die Internetseite ist graphisch ansprechend gestaltet.

**24** Die Internetseite wirkt überladen.

**25** Das Farbkonzept spricht mich an.

**26** Die Internetseite ist klar strukturiert.

**27** Die gewählte Schriftart ist angenehm zu lesen.

**28** Es ist schlecht erkennbar, was wichtig und was unwichtig ist.

**29** Es sind zu viele Bilder im Verhältnis zum Text.

### **Textual deficits**

**30** Der Text hat zu viele Fremdwörter.

**31** Ich kann den wesentlichen Inhalt Anderen erklären.

**32** Den Text kann man auch ohne Vorwissen verstehen.

**33** Der Text macht Schwieriges verständlich.

**34** Ich muss manche Sätze mehrmals durchlesen um sie zu verstehen.

**35** Man hat den Eindruck die Internetseite ist eher für Ärzte gemacht.

**36** Die Sätze sind schwer formuliert.

**37** Ich habe durch den Text etwas gelernt.

### **Usability**

**38** Die gewünschten Informationen sind schwer zu finden.

**39** Die Abbildungen verwirren mich.

**40** Die Seite ist leicht zu bedienen.

**41** Es fällt mir leicht zwischen den Informationen auf der Internetseite hin und her zu springen.

### **Suitability**

**42** Die genannten Empfehlungen sind im Alltag einfach umzusetzen.

**43** Der Text ist zu lang.

**44** Ich kann mit den Informationen nicht viel anfangen.

**45** Die Empfehlungen umzusetzen ist mir zu umständlich.

**Outcome measure**

**46** Ich würde diese Internetseite einem Bekannten mit Schlafstörungen empfehlen.

**47** Für weitere Fragen würde ich mich wieder an diese Internetseite wenden.

**48** Den Informationen auf dieser Internetseite kann ich trauen.

**49** Wenn ich unter Schlafstörungen leide, werde ich diese Informationen nutzen.
